# Supplementary material for: Deactivation of the prefrontal cortex during exposure to pleasantly-charged emotional challenge
Source: PubMed Central journal article supplement (PMC6162331; doi:10.1038/s41598-018-32752-0), 2018-09-28
Supplement: 41598_2018_32752_MOESM1_ESM.pdf [file 41598_2018_32752_MOESM1_ESM.pdf]

# Supplementary information

## Deactivation of the prefrontal cortex during exposure to pleasantly-charged emotional challenge

by

Kanji Matsukawa\*<sup>1</sup>, Ryota Asahara<sup>1</sup>, Miho Yoshikawa<sup>1</sup>, and Kana Endo<sup>1</sup>

Department of Integrative Physiology<sup>1</sup>, Graduate School of Biomedical and Health Sciences, Hiroshima University, 1-2-3 Kasumi, Minami-ku, Hiroshima 734-8551, Japan

## Legends of Supplementary Figures

**Supplementary Figure S1** The dynamic changes in concentrations of prefrontal oxygenated-haemoglobin (Oxy-Hb, with red lines) and deoxygenated-haemoglobin (Deoxy-Hb, with blue lines) are represented over the 22 NIRS channels during emotionally-charged challenges in the same subject. The changes in prefrontal Oxy- and Deoxy-Hb are superimposed in three consecutive trials of each emotional intervention (comedy, landscape, and horror).

**Supplementary Figure S2** The anatomical locations of all near-infrared spectroscopy (NIRS) probes, estimated by a three-dimensional digitizer, are summarised. BA, Brodmann's area. The anatomical brain region and BA corresponding to the location of a NIRS probe are suggested with their occurrence probability (mean  $\pm$  S. E. M.).

## Supplementary Figure S1A

### A. Comedy

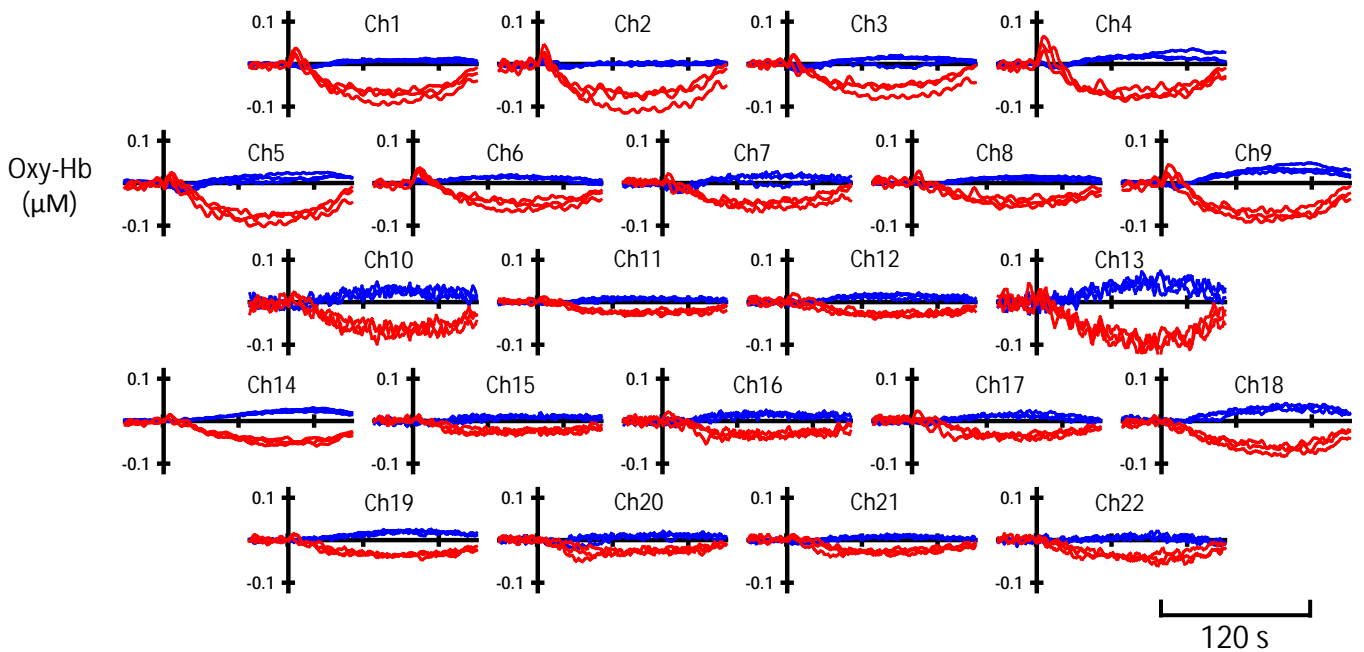

The dynamic changes in concentrations of prefrontal oxygenated-haemoglobin (Oxy-Hb, with red lines) and deoxygenated-haemoglobin (Deoxy-Hb, with blue lines) are represented over the 22 NIRS channels during exposure to the comedy movie in the same subject. The changes in prefrontal Oxy- and Deoxy-Hb are superimposed in three consecutive trials of comedy stimulation.

## Supplementary Figure S1B

### B. Landscape

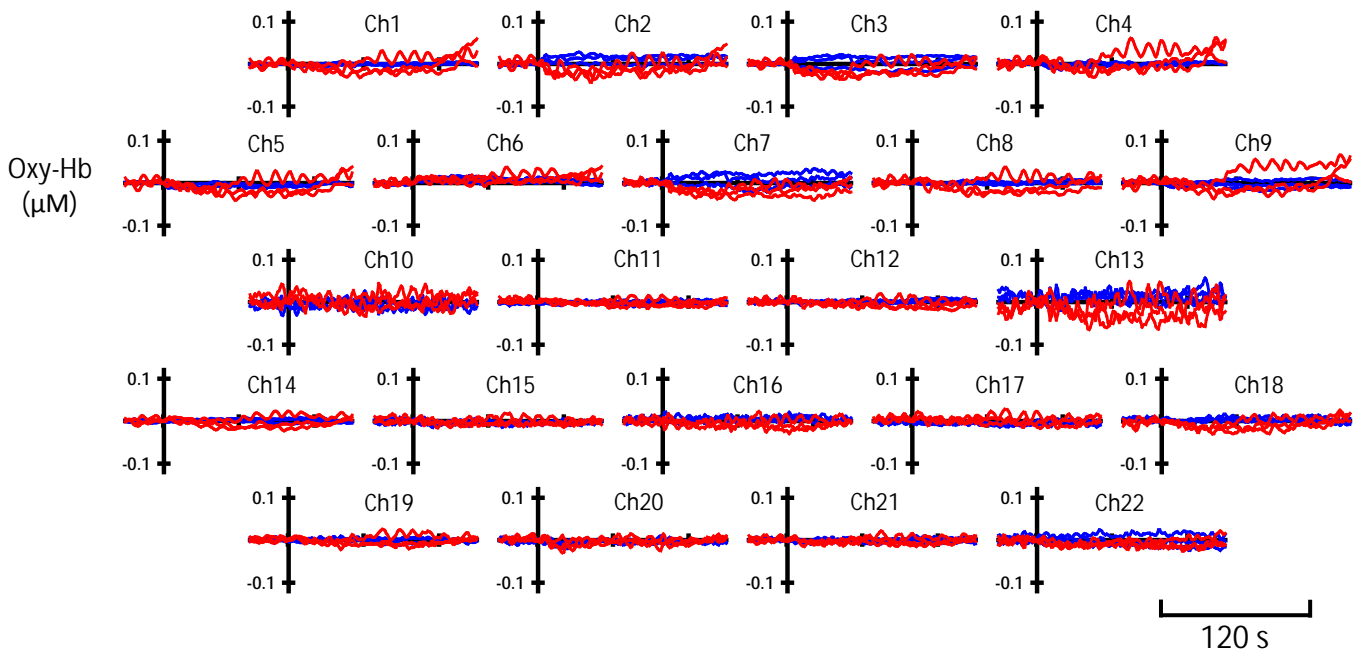

The dynamic changes in concentrations of prefrontal oxygenated-haemoglobin (Oxy-Hb, with red lines) and deoxygenated-haemoglobin (Deoxy-Hb, with blue lines) are represented over the 22 NIRS channels during exposure to the landscape movie in the same subject. The changes in prefrontal Oxy- and Deoxy-Hb are superimposed in three consecutive trials of landscape stimulation.

## Supplementary Figure S1C

### C. Horror

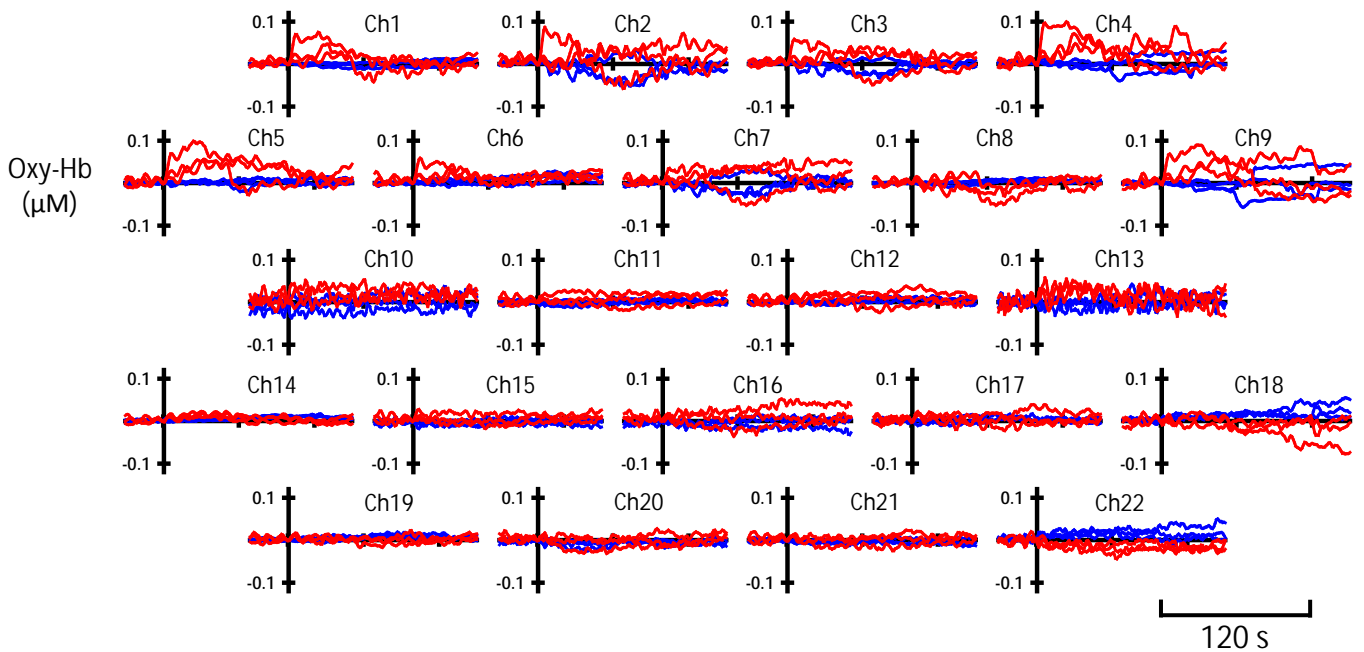

The dynamic changes in concentrations of prefrontal oxygenated-haemoglobin (Oxy-Hb, with red lines) and deoxygenated-haemoglobin (Deoxy-Hb, with blue lines) are represented over the 22 NIRS channels during exposure to the horror movie in the same subject. The changes in prefrontal Oxy- and Deoxy-Hb are superimposed in three consecutive trials of horror stimulation.

# Supplementary Figure S2

| NIRS-Channels | Anatomical cortical region                                                           | BA area              | Probability (%)            |
|---------------|--------------------------------------------------------------------------------------|----------------------|----------------------------|
| Ch1           | Frontopolar area<br>Orbitofrontal area                                               | BA10<br>BA11         | 65 ± 5<br>21 ± 4           |
| Ch2           | Frontopolar area<br>Orbitofrontal area                                               | BA10<br>BA11         | 87 ± 6<br>13 ± 6           |
| Ch3           | Frontopolar area<br>Orbitofrontal area                                               | BA10<br>BA11         | 87 ± 5<br>13 ± 5           |
| Ch4           | Frontopolar area<br>Orbitofrontal area                                               | BA10<br>BA11         | 64 ± 6<br>26 ± 6           |
| Ch5           | Dorsolateral prefrontal cortex<br>Frontopolar area<br>pars triangularis Broca's area | BA46<br>BA10<br>BA45 | 64 ± 3<br>18 ± 5<br>17 ± 5 |
| Ch6           | Frontopolar area                                                                     | BA10                 | 88 ± 5                     |
| Ch7           | Frontopolar area                                                                     | BA10                 | 95 ± 2                     |
| Ch8           | Frontopolar area                                                                     | BA10                 | 86 ± 3                     |
| Ch9           | Dorsolateral prefrontal cortex<br>pars triangularis Broca's area                     | BA46<br>BA45         | 69 ± 4<br>25 ± 6           |
| Ch10          | Dorsolateral prefrontal cortex<br>Frontopolar area                                   | BA46<br>BA10         | 74 ± 4<br>16 ± 5           |
| Ch11          | Frontopolar area<br>Dorsolateral prefrontal cortex                                   | BA10<br>BA9          | 73 ± 8<br>26 ± 8           |
| Ch12          | Frontopolar area<br>Dorsolateral prefrontal cortex                                   | BA10<br>BA9          | 69 ± 9<br>23 ± 8           |
| Ch13          | Dorsolateral prefrontal cortex<br>Frontopolar area<br>pars triangularis Broca's area | BA46<br>BA10<br>BA45 | 69 ± 5<br>16 ± 6<br>13 ± 3 |
| Ch14          | pars triangularis Broca's area<br>Dorsolateral prefrontal cortex                     | BA45<br>BA46         | 55 ± 8<br>38 ± 7           |
| Ch15          | Dorsolateral prefrontal cortex<br>Dorsolateral prefrontal cortex<br>Frontopolar area | BA9<br>BA46<br>BA10  | 63 ± 9<br>24 ± 8<br>14 ± 5 |
| Ch16          | Dorsolateral prefrontal cortex<br>Frontopolar area                                   | BA9<br>BA10          | 68 ± 6<br>29 ± 7           |
| Ch17          | Dorsolateral prefrontal cortex<br>Dorsolateral prefrontal cortex<br>Frontopolar area | BA9<br>BA46<br>BA10  | 52 ± 8<br>27 ± 5<br>21 ± 7 |
| Ch18          | pars triangularis Broca's area<br>Dorsolateral prefrontal cortex                     | BA45<br>BA46         | 75 ± 5<br>22 ± 5           |
| Ch19          | Dorsolateral prefrontal cortex<br>Dorsolateral prefrontal cortex                     | BA9<br>BA46          | 61 ± 8<br>30 ± 6           |
| Ch20          | Dorsolateral prefrontal cortex<br>Includes Frontal eye fields                        | BA9<br>BA8           | 84 ± 6<br>15 ± 6           |
| Ch21          | Dorsolateral prefrontal cortex<br>Includes Frontal eye fields                        | BA9<br>BA8           | 84 ± 6<br>15 ± 7           |
| Ch22          | Dorsolateral prefrontal cortex<br>Dorsolateral prefrontal cortex                     | BA9<br>BA46          | 57 ± 6<br>35 ± 6           |

The anatomical locations of all near-infrared spectroscopy (NIRS) probes, estimated by a magnetic three-dimensional digitizer, are summarised. BA, Brodmann's area. The anatomical brain region and BA corresponding to the location of a NIRS probe are suggested with their occurrence probability (mean ± S. E. M.).
